# Supplementary material for: A microfabricated nerve-on-a-chip platform for rapid assessment of neural conduction in explanted peripheral nerve fibers
Source: PubMed Central journal article supplement (PMC6199302; doi:10.1038/s41467-018-06895-7), 2018-10-23
Supplement: 41467_2018_6895_MOESM2_ESM.pdf [file 41467_2018_6895_MOESM2_ESM.pdf]

## **Description of Additional Supplementary Files**

File Name: Supplementary Movie 1

Description: Rootlet dissection and experimental setup.

File Name: Supplementary Movie 2

Description: MUAP recording played over time.

File Name: Supplementary Movie 3

Description: Heat map over time of P3HT:PCBM during and after illumination.
